# Supplementary material for: CBP/p300 activation promotes axon growth, sprouting, and synaptic plasticity in chronic experimental spinal cord injury with severe disability
Source: PLoS Biol. 2022 Sep 20;20(9):e3001310. doi: 10.1371/journal.pbio.3001310 (PMC9488786; doi:10.1371/journal.pbio.3001310)
Supplement: S1 Data — (XLSX) [file pbio.3001310.s006.xlsx]

## Sheet: 1b
	H3k9ac immunoflorecence in DRG neurons
	Immunofluorecence values (a.u.)	CSP	CSP-TTK21
		2615.82	6832.42
		3717.62	6361.3
		4496.82	6329.5
		3191.57	6672.11
	Mean	3505	6549
	Standard Deviation	799.5	244.2
	Standard Error of Mean	399.8	122.1

## Sheet: 1d
	H3k27ac immunoflorecence in DRG neurons
	Immunofluorecence values (a.u.)	CSP	CSP-TTK21
		7493.8	9866.2
		8183.02	10184.6
		8088.8	9245.89
		6060.68	9819.08
		8861.21
	Mean	7738	9779
	Standard Deviation	1055	390.7
	Standard Error of Mean	472	195.4

## Sheet: 1f
	H3k9ac immunoflorecence in Raphe nucleus
	Immunofluorecence values (a.u.)	CSP	CSP-TTK21
		15.4568	24.5701
		16.2949	31.121
		15.8772	26.8424
		15.9345	25.8804
	Mean	15.89	27.1
	Standard Deviation	0.3434	2.836
	Standard Error of Mean	0.1717	1.418

## Sheet: 1h
	H3k9ac immunoflorecence in layer 5 neurons in cortex
	Immunofluorecence values (a.u.)	CSP	CSP-TTK21
		23.4373	46.4315
		14.9018	45.5773
		16.6279	34.5214
		17.9908	29.5946
	Mean	18.24	39.03
	Standard Deviation	3.689	8.307
	Standard Error of Mean	1.844	4.153

## Sheet: 1j
	H3k27ac immunoflorecence in layer 5 neurons in cortex
	Immunofluorecence values (a.u.)	CSP	CSP-TTK21
		18.0163	39.5814
		24.9549	42.4704
		21.3875	41.0183
		27.2216	45.5157
	Mean	22.9	42.15
	Standard Deviation	4.043	2.537
	Standard Error of Mean	2.021	1.268

## Sheet: 2b
	Atf3 immunoflorecence in DRG neurons
	Immunofluorecence values (a.u.)	CSP	CSP-TTK21
		2753.79	5418
		2368.65	4560.96
		1217.4	3864.03
	Mean	2113	4614
	Standard Deviation	799.4	778.4
	Standard Error of Mean	461.5	449.4

## Sheet: 2d
	Sprr1a immunoflorecence in DRG neurons
	Immunofluorecence values (a.u.)	CSP	CSP-TTK21
		6700.82	11410.3
		6681.65	9853.75
		3214.7	9043.69
		3018.72	7016.02
	Mean	4904	9331
	Standard Deviation	2065	1829
	Standard Error of Mean	1033	914.6

## Sheet: 2f
	cJun immunoflorecence in DRG neurons
	Immunofluorecence values (a.u.)	CSP	CSP-TTK21
		3666.98	5244.87
		4558.21	5243.63
		3349.12	4222.28
		3214.99
	Mean	3697	4904
	Standard Deviation	604.4	590
	Standard Error of Mean	302.2	340.7

## Sheet: 2h
	Klf7 immunoflorecence in DRG neurons
	Immunofluorecence values (a.u.)	CSP	CSP-TTK21
		3577.62	7216.95
		4388.67	7298.45
		3994.07	8603.2
		4428.85	7759.47
	Mean	4097	7720
	Standard Deviation	398.1	635.7
	Standard Error of Mean	199.1	317.9

## Sheet: 2j
	Gap43 immunoflorecence in DRG neurons
	Immunofluorecence values (a.u.)	CSP	CSP-TTK21
		1198.7	4969.35
		868.641	4458.58
		1467.69	4501.07
	Mean	1178	4643
	Standard Deviation	300	283.4
	Standard Error of Mean	173.2	163.6

[truncated: 21 more sheets: 2l, 2n, 3b, 3d, 3f, 3h, 3i, 3k, 3l, 4a, 4b, 4d, 4e, s1a, s1b, s1c, s2b, s2d, s3b, s3c …]
